# Supplementary material
Source: MDPI journal article supplement (https://www.mdpi.com/2036-7422/14/1/7)
Supplement: s1 [file s1]

## SUPPLEMENTARY TABLES AND FIGURES

### TABLE OF CONTENTS

| <b>Supplementary<br/>Table Number</b> | <b>Contents</b>                                                                                       |
|---------------------------------------|-------------------------------------------------------------------------------------------------------|
|                                       |                                                                                                       |
| 1                                     | Overall Study Profile                                                                                 |
| 2                                     | Daily Cannabis Use - Raw Data                                                                         |
| 3                                     | Daily Cannabis Use - Interpolated Data                                                                |
| 4                                     | Pearson Correlation Results - Substances & GCAs                                                       |
| 5                                     | Pearson Correlation Significance - Substances & GCAs                                                  |
| 6                                     | Semi-Quantitative Pearson Correlation Significance - Substances & GCAs                                |
| 7                                     | Semi-Quantitative Pearson Correlation Significance - Cannabinoids & GCAs                              |
| 8                                     | All regression slopes and results from bivariate analyses                                             |
| 9                                     | Variable Importance Tables from Ranger random forest regression - Esophageal stenosis / atresia       |
| 10                                    | Variable Importance Tables from Ranger random forest regression - Bile duct stenosis / atresia        |
| 11                                    | Variable Importance Tables from Ranger Random Forest Regression - Small intestinal stenosis / atresia |
| 12                                    | Variable Importance Tables from Ranger Random Forest Regression - Anorectal stenosis / atresia        |
| 13                                    | Variable Importance Tables from Ranger Random Forest Regression - Hirschprungs disease                |
| 14                                    | Inverse probability weighted panel regression results - Esophageal stenosis / atresia                 |
| 15                                    | Inverse probability weighted panel regression results - Bile duct stenosis / atresia                  |
| 16                                    | Inverse probability weighted panel regression results - Small intestinal stenosis / atresia           |
| 17                                    | Inverse probability weighted panel regression results - Anorectal stenosis / atresia                  |
| 18                                    | Inverse probability weighted panel regression results - Hirschprungs disease                          |

Supplementary Table S1. Sociodemographic Variables, Drug Use and Cannabinoid Exposure

| Variable                                                        | Value             |
|-----------------------------------------------------------------|-------------------|
| Sample Size                                                     | 961               |
| Country (%)                                                     |                   |
| Belgium                                                         | 80 ( 8.3)         |
| Bulgaria                                                        | 80 ( 8.3)         |
| Croatia                                                         | 64 ( 6.7)         |
| Finland                                                         | 35 ( 3.6)         |
| France                                                          | 80 ( 8.3)         |
| Germany                                                         | 80 ( 8.3)         |
| Hungary                                                         | 21 ( 2.2)         |
| Italy                                                           | 80 ( 8.3)         |
| Netherlands                                                     | 72 ( 7.5)         |
| Norway                                                          | 80 ( 8.3)         |
| Poland                                                          | 80 ( 8.3)         |
| Portugal                                                        | 80 ( 8.3)         |
| Spain                                                           | 80 ( 8.3)         |
| Sweden                                                          | 49 ( 5.1)         |
| Year (Range)                                                    | 2010: 2019        |
| Anomaly (%)                                                     |                   |
| Annular pancreas                                                | 122 (12.7)        |
| Ano-rectal atresia and stenosis                                 | 122 (12.7)        |
| Atresia of bile ducts                                           | 122 (12.7)        |
| Atresia or stenosis of other parts of small intestine           | 122 (12.7)        |
| Digestive system                                                | 107 (11.1)        |
| Duodenal atresia or stenosis                                    | 122 (12.7)        |
| Hirschsprung's disease                                          | 122 (12.7)        |
| Oesophageal atresia with or without tracheo-oesophageal fistula | 122 (12.7)        |
| Anomaly_Rate (mean (SD))                                        | 3.02 (5.29)       |
| Tobacco (mean (SD))                                             | 22.78 (5.46)      |
| Alcohol (p.c.L/Yr) (mean (SD))                                  | 10.77 (1.83)      |
| Amphetamines (% Use) (median [IQR])                             | 0.60 [0.30, 0.80] |
| Cocaine (% Use) (median [IQR])                                  | 0.72 [0.40, 1.20] |
| Last_Month_Cannabis (% Use) (mean (SD))                         | 0.04 (0.02)       |
| Cannabis_Herb_THC_Content (%) (mean (SD))                       | 0.09 (0.03)       |
| Cannabis_Resin_THC_Content (%) (mean (SD))                      | 0.16 (0.09)       |
| %_Daily_Cannabis_Use (mean (SD))                                | 0.01 (0.01)       |
| %_Daily_Cannabis_Use_Interpolated (mean (SD))                   | 0.01 (0.01)       |
| Last_Month_Cannabis_x_Herb_THC_Content (mean (SD))              | 0.04 (0.03)       |
| Last_Month_Cannabis_x_Resin_THC_Content (mean (SD))             | 0.13 (0.12)       |

|                                                                                    |                     |
|------------------------------------------------------------------------------------|---------------------|
| Last_Month_Cannabis_x_Herb_THC_Content_x_Daily_Use_Interpolated<br>(median [IQR])  | 0.02 [0.00, 0.06]   |
| Last_Month_Cannabis_x_Resin_THC_Content_x_Daily_Use_Interpolated<br>(median [IQR]) | 0.03 [0.01, 0.13]   |
| Trend_in_Daily_Cannabis_Use = Increasing (%)                                       | 696 (72.4)          |
| Mean_Annual_Household_Income (mean (SD))                                           | 30180.35 (17329.31) |

Supplementary Table S2. Raw Data for Daily Cannabis Drugs Use

[illegible]

Supplementary Table S3. Interpolated Data for Daily Cannabis Drugs Use

[illegible]

Supplementary Table S4. Correlations between Substance and Selected Gastrointestinal Congenital Anomalies.

[illegible]

Supplementary Table S5. Significance Levels of the Correlations Shown in Previous Table.

| Covariate                   | Tobacco | Annual_Alcohol | Daily_Cannabis_Interpolated | Log_Amphetamine | Log_Cocaine | Digestive system | Oesophageal S/A | Duodenal S/A | Small Intestine S/A | Ano-rectal S/A | Hirschsprungs | Bile duct A | Annular Pancreas |
|-----------------------------|---------|----------------|-----------------------------|-----------------|-------------|------------------|-----------------|--------------|---------------------|----------------|---------------|-------------|------------------|
| Tobacco                     | 0       | 0.0000         | 0.2012                      | 0.0724          | 0.0546      | 0.0812           | 0.0133          | 0.5516       | 0.8253              | 0.0076         | 0.0007        | 0.0504      | 0.0107           |
| Annual_Alcohol              | 0.0000  | 0              | 0.1001                      | 0.1776          | 0.0225      | 0.7834           | 0.0893          | 0.7088       | 0.7570              | 0.6293         | 0.2576        | 0.6436      | 0.9604           |
| Daily_Cannabis_Interpolated | 0.2012  | 0.1001         | 0                           | 0.2893          | 0.0000      | 0.0013           | 0.0157          | 0.2161       | 0.0431              | 0.1486         | 0.0000        | 0.0000      | 0.0045           |
| Log_Amphetamine             | 0.0724  | 0.1776         | 0.2893                      | 0               | 0.0164      | 0.9858           | 0.7138          | 0.4740       | 0.8635              | 0.3354         | 0.0153        | 0.1010      | 0.0027           |
| Log_Cocaine                 | 0.0546  | 0.0225         | 0.0000                      | 0.0164          | 0           | 0.0000           | 0.0000          | 0.6740       | 0.0213              | 0.0019         | 0.0000        | 0.0000      | 0.0000           |
| Digestive system            | 0.0812  | 0.7834         | 0.0013                      | 0.9858          | 0.0000      | 0                | 0.0005          | 0.0000       | 0.0001              | 0.0000         | 0.0000        | 0.0000      | 0.0004           |
| Oesophageal S/A             | 0.0133  | 0.0893         | 0.0157                      | 0.7138          | 0.0000      | 0.0005           | 0               | 0.3870       | 0.0002              | 0.0073         | 0.0001        | 0.0006      | 0.0042           |
| Duodenal S/A                | 0.5516  | 0.7088         | 0.2161                      | 0.4740          | 0.6740      | 0.0000           | 0.3870          | 0            | 0.0687              | 0.4649         | 0.2371        | 0.2266      | 0.3002           |
| Small Intestine S/A         | 0.8253  | 0.7570         | 0.0431                      | 0.8635          | 0.0213      | 0.0001           | 0.0002          | 0.0687       | 0                   | 0.7214         | 0.0175        | 0.0587      | 0.0812           |
| Ano-rectal S/A              | 0.0076  | 0.6293         | 0.1486                      | 0.3354          | 0.0019      | 0.0000           | 0.0073          | 0.4649       | 0.7214              | 0              | 0.0008        | 0.0058      | 0.0591           |
| Hirschsprungs               | 0.0007  | 0.2576         | 0.0000                      | 0.0153          | 0.0000      | 0.0000           | 0.0001          | 0.2371       | 0.0175              | 0.0008         | 0             | 0.0000      | 0.0031           |
| Bile duct A                 | 0.0504  | 0.6436         | 0.0000                      | 0.1010          | 0.0000      | 0.0000           | 0.0006          | 0.2266       | 0.0587              | 0.0058         | 0.0000        | 0           | 0.0002           |
| Annular Pancreas            | 0.0107  | 0.9604         | 0.0045                      | 0.0027          | 0.0000      | 0.0004           | 0.0042          | 0.3002       | 0.0812              | 0.0591         | 0.0031        | 0.0002      | 0                |

Supplementary Table S6. Pearson Correlation Coefficients Between Cannabinoids and  
Selected Gastrointestinal Congenital Anomalies .

| Covariates                               | LM_Cannabis | Herb  | Resin  | Daily_Cannabis_Interpolated | LM_Cannabis_x_Herb | LM_Cannabis_x_Resin | Log (LM_Cannabis_x_Herb_x_Daily.Interp) | Log (LM_Cannabis_x_Resin_x_Daily.Interp) | Digestive system | Oesophageal S/A | Duodenal S/A | Small Intestine S/A | Ano-rectal S/A | Hirschsprungs | Bile duct A | Annular Pancreas |
|------------------------------------------|-------------|-------|--------|-----------------------------|--------------------|---------------------|-----------------------------------------|------------------------------------------|------------------|-----------------|--------------|---------------------|----------------|---------------|-------------|------------------|
| LM_Cannabis                              | 1           | 0.031 | 0.035  | 0.851                       | 0.804              | 0.659               | 0.809                                   | 0.728                                    | 0.034            | 0.149           | -0.157       | 0.025               | -0.030         | 0.285         | 0.336       | 0.183            |
| Herb                                     | 0.031       | 1     | 0.505  | 0.031                       | 0.548              | 0.343               | 0.262                                   | 0.250                                    | 0.394            | 0.249           | 0.199        | 0.247               | 0.329          | 0.272         | 0.218       | 0.128            |
| Resin                                    | 0.035       | 0.505 | 1      | -0.049                      | 0.304              | 0.691               | 0.179                                   | 0.387                                    | 0.155            | 0.077           | 0.091        | 0.146               | 0.300          | 0.063         | -0.023      | 0.052            |
| Daily_Cannabis_Interpolated              | 0.851       | 0.031 | -0.049 | 1                           | 0.687              | 0.498               | 0.875                                   | 0.754                                    | 0.225            | 0.180           | -0.155       | 0.111               | 0.091          | 0.453         | 0.400       | 0.242            |
| LM_Cannabis_x_Herb                       | 0.804       | 0.548 | 0.304  | 0.687                       | 1                  | 0.783               | 0.864                                   | 0.812                                    | 0.235            | 0.205           | 0.004        | 0.150               | 0.093          | 0.366         | 0.374       | 0.160            |
| LM_Cannabis_x_Resin                      | 0.659       | 0.343 | 0.691  | 0.498                       | 0.783              | 1                   | 0.712                                   | 0.866                                    | 0.140            | 0.121           | 0.023        | 0.099               | 0.153          | 0.236         | 0.217       | 0.163            |
| Log (LM_Cannabis_x_Herb_x_Daily.Interp)  | 0.809       | 0.262 | 0.179  | 0.875                       | 0.864              | 0.712               | 1                                       | 0.929                                    | 0.231            | 0.154           | -0.046       | 0.152               | 0.033          | 0.417         | 0.364       | 0.162            |
| Log (LM_Cannabis_x_Resin_x_Daily.Interp) | 0.728       | 0.250 | 0.387  | 0.754                       | 0.812              | 0.866               | 0.929                                   | 1                                        | 0.222            | 0.167           | 0.000        | 0.148               | 0.098          | 0.394         | 0.336       | 0.202            |
| Digestive system                         | 0.034       | 0.394 | 0.155  | 0.225                       | 0.235              | 0.140               | 0.231                                   | 0.222                                    | 1                | 0.261           | 0.411        | 0.270               | 0.459          | 0.428         | 0.383       | 0.307            |



|                     |        |       |        |        |       |       |        |       |       |        |        |        |        |       |       |       |
|---------------------|--------|-------|--------|--------|-------|-------|--------|-------|-------|--------|--------|--------|--------|-------|-------|-------|
| Oesophageal S/A     | 0.149  | 0.249 | 0.077  | 0.180  | 0.205 | 0.121 | 0.154  | 0.167 | 0.261 | 1      | -0.115 | 0.292  | 0.220  | 0.325 | 0.279 | 0.248 |
| Duodenal S/A        | -0.157 | 0.199 | 0.091  | -0.155 | 0.004 | 0.023 | -0.046 | 0.000 | 0.411 | -0.115 | 1      | 0.153  | 0.050  | 0.095 | 0.094 | 0.087 |
| Small Intestine S/A | 0.025  | 0.247 | 0.146  | 0.111  | 0.150 | 0.099 | 0.152  | 0.148 | 0.270 | 0.292  | 0.153  | 1      | -0.040 | 0.164 | 0.099 | 0.125 |
| Ano-rectal S/A      | -0.030 | 0.329 | 0.300  | 0.091  | 0.093 | 0.153 | 0.033  | 0.098 | 0.459 | 0.220  | 0.050  | -0.040 | 1      | 0.284 | 0.225 | 0.157 |
| Hirschsprungs       | 0.285  | 0.272 | 0.063  | 0.453  | 0.366 | 0.236 | 0.417  | 0.394 | 0.428 | 0.325  | 0.095  | 0.164  | 0.284  | 1     | 0.441 | 0.259 |
| Bile duct A         | 0.336  | 0.218 | -0.023 | 0.400  | 0.374 | 0.217 | 0.364  | 0.336 | 0.383 | 0.279  | 0.094  | 0.099  | 0.225  | 0.441 | 1     | 0.324 |
| Annular Pancreas    | 0.183  | 0.128 | 0.052  | 0.242  | 0.160 | 0.163 | 0.162  | 0.202 | 0.307 | 0.248  | 0.087  | 0.125  | 0.157  | 0.259 | 0.324 | 1     |

Supplementary Table S7. Significance Levels of Correlation Coefficients of Previous Table

| Covariates                              | LM_Cannabis | Herb     | Resin    | Daily_Cannabis_Interpolated | LM_Cannabis_x_Herb | LM_Cannabis_x_Resin | Log (LM_Cannabis_x_Herb_x_Daily.Interp) | Log (LM_Cannabis_x_Resin_x_Daily.Interp) | Digestive system | Oesophageal S/A | Duodenal S/A | Small Intestine S/A | Ano-rectal S/A | Hirschsprungs | Bile duct A | Annular Pancreas |
|-----------------------------------------|-------------|----------|----------|-----------------------------|--------------------|---------------------|-----------------------------------------|------------------------------------------|------------------|-----------------|--------------|---------------------|----------------|---------------|-------------|------------------|
| LM_Cannabis                             | 0           | 7.61E-01 | 7.32E-01 | 2.70E-28                    | 3.33E-23           | 2.25E-13            | 1.13E-23                                | 2.96E-17                                 | 7.41E-01         | 1.45E-01        | 1.24E-01     | 8.07E-01            | 7.73E-01       | 4.67E-03      | 7.81E-04    | 7.35E-02         |
| Herb                                    | 7.61E-01    | 0        | 1.30E-07 | 7.63E-01                    | 6.21E-09           | 5.81E-04            | 9.55E-03                                | 1.35E-02                                 | 6.63E-05         | 1.39E-02        | 5.09E-02     | 1.48E-02            | 9.86E-04       | 7.14E-03      | 3.15E-02    | 2.12E-01         |
| Resin                                   | 7.32E-01    | 1.30E-07 | 0        | 6.37E-01                    | 2.43E-03           | 4.47E-15            | 7.97E-02                                | 8.89E-05                                 | 1.29E-01         | 4.55E-01        | 3.73E-01     | 1.55E-01            | 2.79E-03       | 5.39E-01      | 8.22E-01    | 6.11E-01         |
| Daily_Cannabis_Interpolated             | 2.70E-28    | 7.63E-01 | 6.37E-01 | 0                           | 7.83E-15           | 2.15E-07            | 1.01E-31                                | 4.69E-19                                 | 2.68E-02         | 7.83E-02        | 1.30E-01     | 2.79E-01            | 3.77E-01       | 3.09E-06      | 5.01E-05    | 1.67E-02         |
| LM_Cannabis_x_Herb                      | 3.33E-23    | 6.21E-09 | 2.43E-03 | 7.83E-15                    | 0                  | 2.66E-21            | 5.33E-30                                | 6.48E-24                                 | 2.07E-02         | 4.35E-02        | 9.70E-01     | 1.43E-01            | 3.63E-01       | 2.25E-04      | 1.60E-04    | 1.17E-01         |
| LM_Cannabis_x_Resin                     | 2.25E-13    | 5.81E-04 | 4.47E-15 | 2.15E-07                    | 2.66E-21           | 0                   | 2.77E-16                                | 2.75E-30                                 | 1.72E-01         | 2.38E-01        | 8.25E-01     | 3.36E-01            | 1.35E-01       | 1.97E-02      | 3.24E-02    | 1.10E-01         |
| Log (LM_Cannabis_x_Herb_x_Daily.Interp) | 1.13E-23    | 9.55E-03 | 7.97E-02 | 1.01E-31                    | 5.33E-30           | 2.77E-16            | 0                                       | 9.26E-43                                 | 2.30E-02         | 1.33E-01        | 6.56E-01     | 1.38E-01            | 7.47E-01       | 2.10E-05      | 2.47E-04    | 1.14E-01         |

|                                                                 |              |              |              |              |              |              |              |              |              |              |              |              |              |              |              |              |
|-----------------------------------------------------------------|--------------|--------------|--------------|--------------|--------------|--------------|--------------|--------------|--------------|--------------|--------------|--------------|--------------|--------------|--------------|--------------|
| Log<br>(LM_C<br>annabi<br>s_x_Re<br>sin_x_<br>Daily.I<br>nterp) | 2.96E-<br>17 | 1.35E-<br>02 | 8.89E-<br>05 | 4.69E-<br>19 | 6.48E-<br>24 | 2.75E-<br>30 | 9.26E-<br>43 | 0            | 2.87E-<br>02 | 1.03E-<br>01 | 9.97E-<br>01 | 1.47E-<br>01 | 3.41E-<br>01 | 6.50E-<br>05 | 7.78E-<br>04 | 4.67E-<br>02 |
| Digesti<br>ve<br>system                                         | 7.41E-<br>01 | 6.63E-<br>05 | 1.29E-<br>01 | 2.68E-<br>02 | 2.07E-<br>02 | 1.72E-<br>01 | 2.30E-<br>02 | 2.87E-<br>02 | 0            | 9.92E-<br>03 | 2.83E-<br>05 | 7.57E-<br>03 | 2.23E-<br>06 | 1.23E-<br>05 | 1.09E-<br>04 | 2.25E-<br>03 |
| Oesop<br>hageal<br>S/A                                          | 1.45E-<br>01 | 1.39E-<br>02 | 4.55E-<br>01 | 7.83E-<br>02 | 4.35E-<br>02 | 2.38E-<br>01 | 1.33E-<br>01 | 1.03E-<br>01 | 9.92E-<br>03 | 0            | 2.63E-<br>01 | 3.69E-<br>03 | 3.06E-<br>02 | 1.17E-<br>03 | 5.66E-<br>03 | 1.43E-<br>02 |
| Duode<br>nal S/A                                                | 1.24E-<br>01 | 5.09E-<br>02 | 3.73E-<br>01 | 1.30E-<br>01 | 9.70E-<br>01 | 8.25E-<br>01 | 6.56E-<br>01 | 9.97E-<br>01 | 2.83E-<br>05 | 2.63E-<br>01 | 0            | 1.36E-<br>01 | 6.29E-<br>01 | 3.56E-<br>01 | 3.58E-<br>01 | 3.98E-<br>01 |
| Small<br>Intestin<br>e S/A                                      | 8.07E-<br>01 | 1.48E-<br>02 | 1.55E-<br>01 | 2.79E-<br>01 | 1.43E-<br>01 | 3.36E-<br>01 | 1.38E-<br>01 | 1.47E-<br>01 | 7.57E-<br>03 | 3.69E-<br>03 | 1.36E-<br>01 | 0            | 7.00E-<br>01 | 1.09E-<br>01 | 3.33E-<br>01 | 2.21E-<br>01 |
| Ano-<br>rectal<br>S/A                                           | 7.73E-<br>01 | 9.86E-<br>04 | 2.79E-<br>03 | 3.77E-<br>01 | 3.63E-<br>01 | 1.35E-<br>01 | 7.47E-<br>01 | 3.41E-<br>01 | 2.23E-<br>06 | 3.06E-<br>02 | 6.29E-<br>01 | 7.00E-<br>01 | 0            | 4.75E-<br>03 | 2.70E-<br>02 | 1.26E-<br>01 |
| Hirsch<br>sprung<br>s                                           | 4.67E-<br>03 | 7.14E-<br>03 | 5.39E-<br>01 | 3.09E-<br>06 | 2.25E-<br>04 | 1.97E-<br>02 | 2.10E-<br>05 | 6.50E-<br>05 | 1.23E-<br>05 | 1.17E-<br>03 | 3.56E-<br>01 | 1.09E-<br>01 | 4.75E-<br>03 | 0            | 6.03E-<br>06 | 1.05E-<br>02 |
| Bile<br>duct A                                                  | 7.81E-<br>04 | 3.15E-<br>02 | 8.22E-<br>01 | 5.01E-<br>05 | 1.60E-<br>04 | 3.24E-<br>02 | 2.47E-<br>04 | 7.78E-<br>04 | 1.09E-<br>04 | 5.66E-<br>03 | 3.58E-<br>01 | 3.33E-<br>01 | 2.70E-<br>02 | 6.03E-<br>06 | 0            | 1.22E-<br>03 |
| Annula<br>r<br>Pancre<br>as                                     | 7.35E-<br>02 | 2.12E-<br>01 | 6.11E-<br>01 | 1.67E-<br>02 | 1.17E-<br>01 | 1.10E-<br>01 | 1.14E-<br>01 | 4.67E-<br>02 | 2.25E-<br>03 | 1.43E-<br>02 | 3.98E-<br>01 | 2.21E-<br>01 | 1.26E-<br>01 | 1.05E-<br>02 | 1.22E-<br>03 | 0            |

Supplementary Table S8. Regression Coefficients from Regression Lines Shown in Figures 1 and 2.

| Anomaly          | Substance                                                            | Mean<br>Anomaly<br>Rate | Estimate | Std.Error | Sigma  | t_statistic | P_Value  | E-Value<br>Estimate | E-Value<br>Lower<br>Bound |
|------------------|----------------------------------------------------------------------|-------------------------|----------|-----------|--------|-------------|----------|---------------------|---------------------------|
|                  |                                                                      |                         |          |           |        |             |          |                     |                           |
| Hirschsprungs    | Daily.Interpol.                                                      | 1.0261                  | 27.7162  | 5.7170    | 0.5366 | 4.8480      | 4.01E-06 | 5.17E+20            | 3.00E+12                  |
| Bile duct A      | Daily.Interpol.                                                      | 0.2861                  | 12.2756  | 2.9410    | 0.2761 | 4.1739      | 5.91E-05 | 7.50E+17            | 4.36E+09                  |
| Digestive system | Daily.Interpol.                                                      | 16.2215                 | 15.6512  | 4.7358    | 0.4332 | 3.3049      | 0.0013   | 3.81E+14            | 1.35E+06                  |
| Annular Pancreas | Daily.Interpol.                                                      | 0.2394                  | 8.4039   | 3.1319    | 0.2940 | 2.6834      | 0.0084   | 3.97E+11            | 2.31E+03                  |
| Digestive system | Herb                                                                 | 16.2215                 | 5.3718   | 1.2704    | 0.4207 | 4.2284      | 5.04E-05 | 2.22E+05            | 1.03E+03                  |
| Digestive system | LMCannabis_Herb                                                      | 16.2215                 | 5.0475   | 1.6875    | 0.4369 | 2.9911      | 0.0035   | 7.36E+04            | 75.53                     |
| Bile duct A      | LMCannabis_Herb                                                      | 0.2861                  | 3.0288   | 0.9811    | 0.2816 | 3.0871      | 0.0025   | 3.56E+04            | 71.65                     |
| Bile duct A      | LM_Cannabis                                                          | 0.2861                  | 3.3413   | 1.1699    | 0.2831 | 2.8561      | 0.0051   | 9.22E+04            | 58.49                     |
| Hirschsprungs    | LM.Cannabis_x_Herb.THC_x_Daily.Interpol.                             | 1.0261                  | 2.8261   | 0.6376    | 0.5444 | 4.4321      | 2.17E-05 | 224.78              | 27.50                     |
| Bile duct A      | LM.Cannabis_x_Herb.THC:<br>LM.Cannabis_x_Resin.THC_x_Daily.Interpol. | 0.2861                  | 1.2190   | 0.3279    | 0.2799 | 3.7173      | 3.15E-04 | 104.66              | 12.55                     |
| Hirschsprungs    | LMCannabis_Herb                                                      | 1.0261                  | 4.9510   | 2.0147    | 0.5783 | 2.4574      | 0.0154   | 4.83E+03            | 9.27                      |
| Hirschsprungs    | LM.Cannabis_x_Resin.THC_x_Daily.Interpol.                            | 1.0261                  | 1.2355   | 0.2891    | 0.5409 | 4.2743      | 4.45E-05 | 15.47               | 5.63                      |
| Digestive system | LM.Cannabis_x_Herb.THC_x_Daily.Interpol.                             | 16.2215                 | 1.5453   | 0.5190    | 0.4371 | 2.9775      | 0.0036   | 49.42               | 5.48                      |
| Ano-rectal S/A   | Resin                                                                | 3.2084                  | 2.1278   | 0.7183    | 0.6457 | 2.9624      | 0.0038   | 39.62               | 4.98                      |
| Bile duct A      | LM.Cannabis_x_Resin.THC_x_Daily.Interpol.                            | 0.2861                  | 0.5219   | 0.1435    | 0.2686 | 3.6366      | 4.43E-04 | 11.20               | 3.96                      |
| Digestive system | Cocaine                                                              | 16.2215                 | 0.2633   | 0.0554    | 0.4128 | 4.7556      | 6.33E-06 | 2.97                | 2.16                      |
| Hirschsprungs    | Cocaine                                                              | 1.0261                  | 0.3172   | 0.0679    | 0.5452 | 4.6723      | 7.85E-06 | 2.79                | 2.06                      |
| Bile duct A      | LMCannabis_Resin                                                     | 0.2861                  | 0.5401   | 0.2296    | 0.2749 | 2.3520      | 0.0205   | 11.43               | 2.04                      |
| Annular Pancreas | Cocaine                                                              | 0.2394                  | 0.1521   | 0.0347    | 0.2788 | 4.3819      | 2.54E-05 | 2.67                | 1.96                      |
| Bile duct A      | Cocaine                                                              | 0.2861                  | 0.1421   | 0.0340    | 0.2734 | 4.1736      | 5.70E-05 | 2.59                | 1.89                      |
| Annular Pancreas | Log(Amphetamine)                                                     | 0.2394                  | 0.1256   | 0.0359    | 0.2860 | 3.5018      | 6.50E-04 | 2.35                | 1.67                      |
| Oesophageal S/A  | Cocaine                                                              | 2.4957                  | 0.2230   | 0.0706    | 0.5671 | 3.1573      | 0.0020   | 2.21                | 1.55                      |

|                     |                                           |         |        |        |        |        |        |       |      |
|---------------------|-------------------------------------------|---------|--------|--------|--------|--------|--------|-------|------|
| Digestive system    | LM.Cannabis_x_Resin.THC_x_Daily.Interpol. | 16.2215 | 0.4925 | 0.2217 | 0.4128 | 2.2213 | 0.0287 | 5.37  | 1.54 |
| Annular Pancreas    | LM.Cannabis_x_Resin.THC_x_Daily.Interpol. | 0.2394  | 0.3478 | 0.1631 | 0.3052 | 2.1328 | 0.0354 | 5.09  | 1.40 |
| Small Intestine S/A | LM.Cannabis_x_Herb.THC_x_Daily.Interpol.  | 1.0052  | 1.3045 | 0.6589 | 0.5625 | 1.9799 | 0.0502 | 15.99 | 1.19 |
| Ano-rectal S/A      | Cocaine                                   | 3.2084  | 0.1748 | 0.0809 | 0.6499 | 2.1597 | 0.0328 | 1.87  | 1.18 |
| Small Intestine S/A | Cocaine                                   | 1.0052  | 0.1404 | 0.0685 | 0.5505 | 2.0487 | 0.0427 | 1.84  | 1.11 |
| Duodenal S/A        | Log(Amphetamine)                          | 1.3088  | 0.0056 | 0.0753 | 0.6005 | 0.0749 | 0.9404 | 1.10  | 1    |
| Digestive system    | Annual_Alcohol                            | 16.2215 | 0.0065 | 0.0234 | 0.4550 | 0.2756 | 0.7834 | 1.13  | 1    |
| Small Intestine S/A | Annual_Alcohol                            | 1.0052  | 0.0094 | 0.0278 | 0.5598 | 0.3391 | 0.7351 | 1.14  | 1    |
| Small Intestine S/A | Log(Amphetamine)                          | 1.0052  | 0.0115 | 0.0702 | 0.5600 | 0.1644 | 0.8697 | 1.16  | 1    |
| Oesophageal S/A     | Log(Amphetamine)                          | 2.4957  | 0.0300 | 0.0740 | 0.5898 | 0.4053 | 0.6860 | 1.27  | 1    |
| Ano-rectal S/A      | Log(Amphetamine)                          | 3.2084  | 0.1395 | 0.0821 | 0.6546 | 1.6996 | 0.0918 | 1.72  | 1    |
| Bile duct A         | Resin                                     | 0.2861  | 0.0783 | 0.3137 | 0.2820 | 0.2495 | 0.8035 | 1.90  | 1    |
| Ano-rectal S/A      | LM.Cannabis_x_Herb.THC_x_Daily.Interpol.  | 3.2084  | 0.2448 | 0.7872 | 0.6721 | 0.3110 | 0.7564 | 2.13  | 1    |
| Ano-rectal S/A      | LM.Cannabis_x_Resin.THC_x_Daily.Interpol. | 3.2084  | 0.3264 | 0.3643 | 0.6817 | 0.8958 | 0.3725 | 2.46  | 1    |
| Oesophageal S/A     | LMCannabis_Resin                          | 2.4957  | 0.3251 | 0.4952 | 0.5930 | 0.6564 | 0.5130 | 2.68  | 1    |
| Small Intestine S/A | LM.Cannabis_x_Resin.THC_x_Daily.Interpol. | 1.0052  | 0.4475 | 0.3007 | 0.5627 | 1.4884 | 0.1399 | 3.54  | 1    |
| Small Intestine S/A | LMCannabis_Resin                          | 1.0052  | 0.4456 | 0.4614 | 0.5525 | 0.9658 | 0.3364 | 3.59  | 1    |
| Oesophageal S/A     | Resin                                     | 2.4957  | 0.4795 | 0.6593 | 0.5927 | 0.7273 | 0.4686 | 3.60  | 1    |
| Ano-rectal S/A      | LMCannabis_Resin                          | 3.2084  | 0.5546 | 0.5587 | 0.6690 | 0.9926 | 0.3232 | 3.67  | 1    |
| Duodenal S/A        | Herb                                      | 1.3088  | 0.5024 | 1.5437 | 0.6003 | 0.3254 | 0.7454 | 3.71  | 1    |
| Oesophageal S/A     | LM.Cannabis_x_Resin.THC_x_Daily.Interpol. | 2.4957  | 0.5138 | 0.3168 | 0.5927 | 1.6221 | 0.1080 | 3.83  | 1    |
| Duodenal S/A        | Resin                                     | 1.3088  | 0.5453 | 0.6828 | 0.6138 | 0.7986 | 0.4264 | 3.92  | 1    |
| Hirschsprungs       | Resin                                     | 1.0261  | 0.6290 | 0.6558 | 0.5895 | 0.9593 | 0.3396 | 4.72  | 1    |
| Annular Pancreas    | Resin                                     | 0.2394  | 0.3396 | 0.3412 | 0.3068 | 0.9952 | 0.3219 | 4.92  | 1    |
| Digestive system    | LMCannabis_Resin                          | 16.2215 | 0.5046 | 0.3668 | 0.4192 | 1.3759 | 0.1721 | 5.43  | 1    |
| Annular Pancreas    | LMCannabis_Resin                          | 0.2394  | 0.3965 | 0.2545 | 0.3047 | 1.5580 | 0.1222 | 5.99  | 1    |
| Hirschsprungs       | LMCannabis_Resin                          | 1.0261  | 0.9275 | 0.4861 | 0.5821 | 1.9080 | 0.0591 | 7.99  | 1    |
| Digestive system    | Resin                                     | 16.2215 | 0.7446 | 0.4858 | 0.4182 | 1.5328 | 0.1286 | 9.58  | 1    |
| Small Intestine S/A | Resin                                     | 1.0052  | 1.0183 | 0.6092 | 0.5477 | 1.6714 | 0.0976 | 10.34 | 1    |

|                     |                                           |         |         |        |        |         |        |          |    |
|---------------------|-------------------------------------------|---------|---------|--------|--------|---------|--------|----------|----|
| Oesophageal S/A     | LM.Cannabis_x_Herb.THC_x_Daily.Interpol.  | 2.4957  | 1.0996  | 0.6890 | 0.5883 | 1.5959  | 0.1133 | 10.43    | 1  |
| Oesophageal S/A     | LM_Cannabis                               | 2.4957  | 1.1847  | 2.4364 | 0.5897 | 0.4862  | 0.6277 | 11.92    | 1  |
| Annular Pancreas    | LM.Cannabis_x_Herb.THC_x_Daily.Interpol.  | 0.2394  | 0.6263  | 0.3502 | 0.2990 | 1.7883  | 0.0764 | 12.93    | 1  |
| Small Intestine S/A | LM_Cannabis                               | 1.0052  | 1.2445  | 2.3112 | 0.5594 | 0.5385  | 0.5912 | 14.63    | 1  |
| Oesophageal S/A     | Herb                                      | 2.4957  | 1.4142  | 1.5125 | 0.5881 | 0.9350  | 0.3517 | 17.32    | 1  |
| Annular Pancreas    | Herb                                      | 0.2394  | 0.8060  | 0.7687 | 0.2989 | 1.0485  | 0.2965 | 22.76    | 1  |
| Bile duct A         | Herb                                      | 0.2861  | 0.8016  | 0.7489 | 0.2912 | 1.0703  | 0.2866 | 23.98    | 1  |
| Oesophageal S/A     | LMCannabis_Herb                           | 2.4957  | 2.0509  | 2.0477 | 0.5878 | 1.0016  | 0.3186 | 47.36    | 1  |
| Hirschsprungs       | Herb                                      | 1.0261  | 2.2365  | 1.5106 | 0.5874 | 1.4806  | 0.1413 | 63.45    | 1  |
| Ano-rectal S/A      | Herb                                      | 3.2084  | 2.8155  | 1.6842 | 0.6549 | 1.6717  | 0.0972 | 99.54    | 1  |
| Annular Pancreas    | LMCannabis_Herb                           | 0.2394  | 1.3203  | 1.0390 | 0.2983 | 1.2707  | 0.2063 | 111.82   | 1  |
| Small Intestine S/A | Herb                                      | 1.0052  | 2.4883  | 1.4223 | 0.5530 | 1.7495  | 0.0828 | 119.50   | 1  |
| Digestive system    | LM_Cannabis                               | 16.2215 | 2.0964  | 2.1109 | 0.4530 | 0.9931  | 0.3229 | 134.37   | 1  |
| Small Intestine S/A | Daily.Interpol.                           | 1.0052  | 3.0240  | 1.9314 | 0.5544 | 1.5657  | 0.1201 | 285.68   | 1  |
| Annular Pancreas    | LM_Cannabis                               | 0.2394  | 1.7605  | 1.2302 | 0.2977 | 1.4311  | 0.1550 | 433.99   | 1  |
| Hirschsprungs       | LM_Cannabis                               | 1.0261  | 3.9413  | 2.4224 | 0.5863 | 1.6270  | 0.1064 | 907.04   | 1  |
| Ano-rectal S/A      | Daily.Interpol.                           | 3.2084  | 6.4243  | 7.1376 | 0.6700 | 0.9001  | 0.3700 | 1.23E+04 | 1  |
| Small Intestine S/A | Daily.Interpol.                           | 1.0052  | 10.9181 | 6.0085 | 0.5640 | 1.8171  | 0.0719 | 8.95E+07 | 1  |
| Oesophageal S/A     | Daily.Interpol.                           | 2.4957  | 11.8979 | 6.2377 | 0.5855 | 1.9074  | 0.0590 | 2.15E+08 | 1  |
| Digestive system    | Log(Amphetamine)                          | 16.2215 | -0.0010 | 0.0588 | 0.4551 | -0.0178 | 0.9858 | 1.05     | NA |
| Annular Pancreas    | Annual_Alcohol                            | 0.2394  | -0.0008 | 0.0149 | 0.3003 | -0.0565 | 0.9550 | 1.05     | NA |
| Bile duct A         | Annual_Alcohol                            | 0.2861  | -0.0022 | 0.0146 | 0.2926 | -0.1485 | 0.8822 | 1.09     | NA |
| Small Intestine S/A | Tobacco                                   | 1.0052  | -0.0058 | 0.0093 | 0.5591 | -0.6217 | 0.5353 | 1.11     | NA |
| Duodenal S/A        | Annual_Alcohol                            | 1.3088  | -0.0075 | 0.0299 | 0.6004 | -0.2496 | 0.8033 | 1.12     | NA |
| Duodenal S/A        | Tobacco                                   | 1.3088  | -0.0121 | 0.0099 | 0.5969 | -1.2164 | 0.2262 | 1.16     | NA |
| Ano-rectal S/A      | Annual_Alcohol                            | 3.2084  | -0.0145 | 0.0329 | 0.6619 | -0.4402 | 0.6606 | 1.16     | NA |
| Digestive system    | Tobacco                                   | 16.2215 | -0.0137 | 0.0078 | 0.4486 | -1.7605 | 0.0812 | 1.20     | NA |
| Duodenal S/A        | LM.Cannabis_x_Resin.THC_x_Daily.Interpol. | 1.3088  | -0.0300 | 0.3343 | 0.6255 | -0.0898 | 0.9286 | 1.26     | NA |
| Bile duct A         | Tobacco                                   | 0.2861  | -0.0137 | 0.0047 | 0.2828 | -2.9069 | 0.0043 | 1.26     | NA |
| Oesophageal S/A     | Tobacco                                   | 2.4957  | -0.0297 | 0.0094 | 0.5672 | -3.1521 | 0.0020 | 1.28     | NA |
| Annular Pancreas    | Tobacco                                   | 0.2394  | -0.0156 | 0.0048 | 0.2877 | -3.2651 | 0.0014 | 1.28     | NA |
| Ano-rectal S/A      | Tobacco                                   | 3.2084  | -0.0349 | 0.0106 | 0.6342 | -3.3037 | 0.0013 | 1.28     | NA |

|                 |                                          |        |          |        |        |         |          |          |    |
|-----------------|------------------------------------------|--------|----------|--------|--------|---------|----------|----------|----|
| Hirschsprungs   | Annual_Alcohol                           | 1.0261 | -0.0350  | 0.0293 | 0.5892 | -1.1928 | 0.2353   | 1.30     | NA |
| Hirschsprungs   | Tobacco                                  | 1.0261 | -0.0398  | 0.0092 | 0.5510 | -4.3427 | 2.96E-05 | 1.34     | NA |
| Oesophageal S/A | Annual_Alcohol                           | 2.4957 | -0.0512  | 0.0290 | 0.5827 | -1.7662 | 0.0799   | 1.38     | NA |
| Bile duct A     | Resin                                    | 0.2861 | -0.0319  | 0.0366 | 0.2917 | -0.8722 | 0.3848   | 1.44     | NA |
| Ano-rectal S/A  | LMCannabis_Herb                          | 3.2084 | -0.0866  | 2.3077 | 0.6624 | -0.0375 | 0.9701   | 1.50     | NA |
| Duodenal S/A    | Cocaine                                  | 1.3088 | -0.0952  | 0.0743 | 0.5965 | -1.2818 | 0.2024   | 1.58     | NA |
| Hirschsprungs   | Log(Amphetamine)                         | 1.0261 | -0.1100  | 0.0736 | 0.5873 | -1.4932 | 0.1380   | 1.66     | NA |
| Duodenal S/A    | LMCannabis_Resin                         | 1.3088 | -0.1515  | 0.5140 | 0.6154 | -0.2948 | 0.7687   | 1.81     | NA |
| Duodenal S/A    | LM.Cannabis_x_Herb.THC_x_Daily.Interpol. | 1.3088 | -0.5096  | 0.7116 | 0.6075 | -0.7162 | 0.4753   | 3.71     | NA |
| Duodenal S/A    | LMCannabis_Herb                          | 1.3088 | -2.3470  | 2.0811 | 0.5974 | -1.1278 | 0.2617   | 70.90    | NA |
| Ano-rectal S/A  | LM_Cannabis                              | 3.2084 | -3.1167  | 2.7223 | 0.6589 | -1.1449 | 0.2545   | 147.60   | NA |
| Duodenal S/A    | LM_Cannabis                              | 1.3088 | -6.2253  | 2.4153 | 0.5846 | -2.5774 | 0.0112   | 3.23E+04 | NA |
| Duodenal S/A    | Daily.Interpol.                          | 1.3088 | -11.5891 | 6.3943 | 0.6002 | -1.8124 | 0.0726   | 8.55E+07 | NA |

Supplementary Table S9. Forest Regression and Variable Importance Table  
- Esophageal Stenosis and Atresia

| Variable                                 | Importance |
|------------------------------------------|------------|
| Income                                   | 7.4817     |
| Tobacco                                  | 5.7847     |
| Resin                                    | 3.1387     |
| Cocaine                                  | 2.9261     |
| Daily.Interpol.                          | 2.7509     |
| LM.Cannabis_x_Herb.THC_x_Daily.Interpol. | 2.6959     |
| LM.Cannabis_x_Resin.THC                  | 2.5971     |
| Daily.Interpol.                          | 2.5685     |
| Alcohol                                  | 2.0999     |
| LM.Cannabis_x_Herb.THC                   | 1.9033     |
| LM.Cannabis                              | 1.8734     |
| Herb                                     | 1.7290     |
| Amphetamines                             | 1.5916     |



Supplementary Table S10. Forest Regression and Variable Importance Table  
- Bile Duct Atresia

| Variable                                  | Importance |
|-------------------------------------------|------------|
| Income                                    | 2.1659     |
| Tobacco                                   | 0.9401     |
| Daily.Interpol.                           | 0.7664     |
| Cocaine                                   | 0.7149     |
| Alcohol                                   | 0.7062     |
| LM.Cannabis_x_Resin.THC_x_Daily.Interpol. | 0.6995     |
| LM.Cannabis_x_Herb.THC_x_Daily.Interpol.  | 0.6529     |
| Amphetamines                              | 0.6441     |
| LM.Cannabis                               | 0.5538     |
| LM.Cannabis_x_Resin.THC                   | 0.5272     |
| LM.Cannabis_x_Herb.THC                    | 0.4930     |
| Resin                                     | 0.4393     |
| Herb                                      | 0.4119     |

Supplementary Table S11. Forest Regression and Variable Importance Table  
- Small Intestinal Stenosis and Atresia

| Variable                                  | Importance |
|-------------------------------------------|------------|
| Income                                    | 4.3228     |
| Tobacco                                   | 4.2394     |
| Daily.Interpol.                           | 3.2878     |
| LM.Cannabis_x_Resin.THC_x_Daily.Interpol. | 3.2707     |
| LM.Cannabis_x_Herb.THC_x_Daily.Interpol.  | 2.6342     |
| LM.Cannabis_x_Resin.THC                   | 2.4123     |
| Herb                                      | 2.3969     |
| Resin                                     | 2.3410     |
| Cocaine                                   | 2.0365     |
| Amphetamines                              | 2.0189     |
| LM.Cannabis_x_Herb.THC                    | 1.9242     |
| LM.Cannabis                               | 1.8381     |
| Alcohol                                   | 1.6612     |

Supplementary Table S12. Forest Regression and Variable Importance Table  
- Large Intestinal Stenosis and Atresia

| Variable                                                             | Importance |
|----------------------------------------------------------------------|------------|
| Income                                                               | 10.7345    |
| Tobacco                                                              | 7.9453     |
| Resin                                                                | 3.7489     |
| Herb                                                                 | 3.5230     |
| LM.Cannabis_x_Herb.THC_x_Daily.Interpol.                             | 3.0013     |
| Daily.Interpol.                                                      | 2.8507     |
| LM.Cannabis_x_Resin.THC_x_Daily.Interpol.                            | 2.8467     |
| LM.Cannabis                                                          | 2.6059     |
| LM.Cannabis_x_Herb.THC                                               | 2.5638     |
| Cocaine                                                              | 2.5331     |
| Alcohol                                                              | 2.3779     |
| LM.Cannabis_x_Herb.THC:<br>LM.Cannabis_x_Resin.THC_x_Daily.Interpol. | 2.3016     |
| LM.Cannabis_x_Resin.THC                                              | 2.2129     |

Supplementary Table S13. Forest Regression and Variable Importance Table  
- Hirschprungs Disease / Congenital Megacolon

| Variable                                  | Importance |
|-------------------------------------------|------------|
| Income                                    | 9.3342     |
| Resin                                     | 6.1273     |
| Daily.Interpol.                           | 3.6838     |
| Cocaine                                   | 2.8498     |
| LM.Cannabis_x_Resin.THC_x_Daily.Interpol. | 2.7871     |
| LM.Cannabis_x_Herb.THC_x_Daily.Interpol.  | 2.6591     |
| Alcohol                                   | 2.3730     |
| LM.Cannabis_x_Herb.THC                    | 2.0344     |
| LM.Cannabis                               | 1.8889     |
| LM.Cannabis_x_Resin.THC                   | 1.7612     |
| Amphetamines                              | 1.7370     |
| Herb                                      | 1.4887     |
| Resin                                     | 1.3853     |

Supplementary Table S14. Panel Regression Table for Esophageal Stenosis and Atresia

| Parameters                                                                                                                                                                                                   |                      |          | Model Parameters |          |
|--------------------------------------------------------------------------------------------------------------------------------------------------------------------------------------------------------------|----------------------|----------|------------------|----------|
| Term                                                                                                                                                                                                         | Estimate (C.I.)      | P-Value  | Parameter        | Value    |
|                                                                                                                                                                                                              |                      |          |                  |          |
| <i>Additive</i>                                                                                                                                                                                              |                      |          |                  |          |
| <i>(LANomRt ~ TobRt + AlcRt + LpmHerbDailyInt + LpmResinDailyInt + pm.Daily.Intpltd + pmResin + LAmph + LCocc + MHY)</i>                                                                                     |                      |          |                  |          |
| Alcohol                                                                                                                                                                                                      | -0.1 (-0.15, -0.05)  | 0.0001   | Adj.R.Squared    | 0.0345   |
| Daily.Interpol.                                                                                                                                                                                              | 11.36 (6.37, 16.34)  | 1.83E-05 | Statistic        | 11.7614  |
|                                                                                                                                                                                                              |                      |          | Deg.Freedom      | 2,119    |
|                                                                                                                                                                                                              |                      |          | P-Value          | 2.18E-05 |
|                                                                                                                                                                                                              |                      |          |                  |          |
| <i>Interactive</i>                                                                                                                                                                                           |                      |          |                  |          |
| <i>Rate ~ Tobacco * Daily.Interpol. + Resin + LM.Cannabis_x_Resin.THC_x_Daily.Interpol. + LM.Cannabis_x_Herb.THC_x_Daily.Interpol. * LM.Cannabis_x_Resin.THC + Alcohol + Amphetamines + Cocaine + Income</i> |                      |          |                  |          |
| Tobacco                                                                                                                                                                                                      | -0.02 (-0.04, -0.01) | 0.0047   | Adj.R.Squared    | 0.1165   |
| LM.Cannabis_x_Resin.THC_x_Daily.Interpol.                                                                                                                                                                    | 0.6 (0.04, 1.16)     | 0.0381   | Statistic        | 9.288    |
| LM.Cannabis_x_Herb.THC_x_Daily.Interpol.                                                                                                                                                                     | -0.53 (-0.98, -0.07) | 0.0256   | Deg.Freedom      | 2,119    |
| Cocaine                                                                                                                                                                                                      | 0.16 (0.06, 0.26)    | 0.0019   | P-Value          | 1.80E-03 |
|                                                                                                                                                                                                              |                      |          |                  |          |
| <i>2 Lags</i>                                                                                                                                                                                                |                      |          |                  |          |
| <i>Rate ~ Tobacco * Daily.Interpol. + LM.Cannabis_x_Resin.THC_x_Daily.Interpol. * LM.Cannabis_x_Herb.THC_x_Daily.Interpol. + Resin + Alcohol + Amphetamines + Cocaine + Income</i>                           |                      |          |                  |          |
| Resin                                                                                                                                                                                                        | -1.59 (-2.96, -0.22) | 0.0232   | Adj.R.Squared    | 0.1271   |
| LM.Cannabis_x_Resin.THC                                                                                                                                                                                      | 2.57 (1.18, 3.96)    | 0.0003   | Statistic        | 6.1838   |
| Income                                                                                                                                                                                                       | 0 (0, 0)             | 0.0008   | Deg.Freedom      | 2,91     |
|                                                                                                                                                                                                              |                      |          | P-Value          | 3.00E-03 |

Supplementary Table S15. Panel Regression Table for Bile Duct Atresia

| Parameters                                                                                                                                                                                                  |                      |          | Model Parameters |          |
|-------------------------------------------------------------------------------------------------------------------------------------------------------------------------------------------------------------|----------------------|----------|------------------|----------|
| Term                                                                                                                                                                                                        | Estimate (C.I.)      | P-Value  | Parameter        | Value    |
| <i>Additive</i>                                                                                                                                                                                             |                      |          |                  |          |
| <i>Rate ~ Tobacco + Alcohol + LM.Cannabis_x_Herb.THC_x_Daily.Interpol. + LM.Cannabis_x_Resin.THC_x_Daily.Interpol. + LM.Cannabis_x_Resin.THC + Daily.Interpol. + Amphetamines + Cocaine + Income</i>        |                      |          |                  |          |
| Alcohol                                                                                                                                                                                                     | 0.13 (0.07, 0.19)    | 4.03E-05 | Adj.R.Squared    | 0.1516   |
| LM.Cannabis_x_Herb.THC_x_Daily.Interpol.                                                                                                                                                                    | -0.42 (-0.72, -0.13) | 0.0054   | Statistic        | 10.9696  |
| LM.Cannabis_x_Resin.THC_x_Daily.Interpol.                                                                                                                                                                   | 0.48 (0.15, 0.8)     | 0.0046   | Deg.Freedom      | 5,116    |
| Daily.Interpol.                                                                                                                                                                                             | -14.8 (-30.01, 0.41) | 0.0589   | P-Value          | 1.16E-08 |
| Amphetamines                                                                                                                                                                                                | -0.15 (-0.29, -0.01) | 0.0341   |                  |          |
| Cocaine                                                                                                                                                                                                     | 0.36 (0.13, 0.58)    | 0.0028   |                  |          |
| Income                                                                                                                                                                                                      | 0 (0, 0)             | 0.0069   |                  |          |
| <i>Interactive</i>                                                                                                                                                                                          |                      |          |                  |          |
| <i>Rate ~ Tobacco * Daily.Interpol. * LM.Cannabis_x_Resin.THC_x_Daily.Interpol. + LM.Cannabis_x_Herb.THC_x_Daily.Interpol. + LM.Cannabis_x_Resin.THC + Alcohol + Amphetamines + Cocaine + Income</i>        |                      |          |                  |          |
| LM.Cannabis_x_Resin.THC_x_Daily.Interpol.                                                                                                                                                                   | 0.22 (0.05, 0.39)    | 0.0116   | Adj.R.Squared    | 0.1516   |
| LM.Cannabis_x_Herb.THC_x_Daily.Interpol.                                                                                                                                                                    | -0.2 (-0.36, -0.03)  | 0.0239   | Statistic        | 10.9696  |
| Alcohol                                                                                                                                                                                                     | 0.09 (0.04, 0.15)    | 0.0008   | Deg.Freedom      | 5,116    |
| Cocaine                                                                                                                                                                                                     | 0.13 (0.05, 0.21)    | 0.0013   | P-Value          | 1.16E-08 |
| Income                                                                                                                                                                                                      | 0 (0, 0)             | 0.0011   |                  |          |
| <i>2 Lags</i>                                                                                                                                                                                               |                      |          |                  |          |
| <i>Rate ~ Tobacco * LM.Cannabis_x_Herb.THC_x_Daily.Interpol. + Daily.Interpol. * LM.Cannabis_x_Resin.THC_x_Daily.Interpol. + LM.Cannabis_x_Resin.THC + Alcohol + Amphetamines + Cocaine + Income-Income</i> |                      |          |                  |          |
| Cocaine                                                                                                                                                                                                     | 0.18 (0.08, 0.27)    | 0.0003   | Adj.R.Squared    | 0.1154   |
| Daily.Interpol.: LM.Cannabis_x_Resin.THC_x_Daily.Interpol.                                                                                                                                                  | 8.08 (2.91, 13.26)   | 0.0029   | Statistic        | 13.5844  |
|                                                                                                                                                                                                             |                      |          | Deg.Freedom      | 2,91     |
|                                                                                                                                                                                                             |                      |          | P-Value          | 6.88E-04 |

Supplementary Table S16. Panel Regression Table for Small Intestinal Stenosis and Atresia

| Parameters                                                                                                                                                                                                  |                       |          | Model Parameters |          |
|-------------------------------------------------------------------------------------------------------------------------------------------------------------------------------------------------------------|-----------------------|----------|------------------|----------|
| Term                                                                                                                                                                                                        | Estimate (C.I.)       | P-Value  | Parameter        | Value    |
|                                                                                                                                                                                                             |                       |          |                  |          |
| <i>Additive</i>                                                                                                                                                                                             |                       |          |                  |          |
| <i>Rate ~ Tobacco + Alcohol + LM.Cannabis_x_Herb.THC_x_Daily.Interpol. + LM.Cannabis_x_Resin.THC_x_Daily.Interpol. + LM.Cannabis_x_Resin.THC + Herb + Daily.Interpol. + Amphetamines + Cocaine + Income</i> |                       |          |                  |          |
| LM.Cannabis_x_Herb.THC_x_Daily.Interpol.                                                                                                                                                                    | -0.85 (-1.1, -0.6)    | 7.10E-10 | Adj.R.Squared    | 0.01768  |
| LM.Cannabis_x_Resin.THC_x_Daily.Interpol.                                                                                                                                                                   | 0.98 (0.73, 1.22)     | 3.55E-12 | Statistic        | 31.7325  |
|                                                                                                                                                                                                             |                       |          | Deg.Freedom      | 2,119    |
|                                                                                                                                                                                                             |                       |          | P-Value          | 9.01E-12 |
|                                                                                                                                                                                                             |                       |          |                  |          |
| <i>Interactive</i>                                                                                                                                                                                          |                       |          |                  |          |
| <i>Rate ~ Tobacco * Daily.Interpol. + LM.Cannabis_x_Herb.THC_x_Daily.Interpol. * LM.Cannabis_x_Resin.THC_x_Daily.Interpol. * LM.Cannabis_x_Resin.THC + Alcohol + Herb + Amphetamines + Cocaine + Income</i> |                       |          |                  |          |
| Tobacco                                                                                                                                                                                                     | 0.1 (0.05, 0.15)      | 8.43E-05 | Adj.R.Squared    | -0.0302  |
| Daily.Interpol.                                                                                                                                                                                             | 242 (129.89, 354.11)  | 4.59E-05 | Statistic        | 18.9707  |
| LM.Cannabis_x_Herb.THC: LM.Cannabis_x_Resin.THC_x_Daily.Interpol.                                                                                                                                           | -1.76 (-2.76, -0.76)  | 0.0007   | Deg.Freedom      | 7,114    |
| Amphetamines                                                                                                                                                                                                | -0.25 (-0.44, -0.06)  | 0.0115   | P-Value          | <2.2E-16 |
| Income                                                                                                                                                                                                      | 0 (0, 0)              | 0.0005   |                  |          |
| Tobacco: Daily.Interpol.                                                                                                                                                                                    | -9.48 (-13.91, -5.05) | 5.51E-05 |                  |          |
| LM.Cannabis_x_Resin.THC_x_Daily.Interpol.: LM.Cannabis_x_Resin.THC                                                                                                                                          | 1.96 (1.18, 2.74)     | 2.84E-06 |                  |          |
|                                                                                                                                                                                                             |                       |          |                  |          |
| <i>2 Lags</i>                                                                                                                                                                                               |                       |          |                  |          |

|                                                                                                                                                                                       |                      |          |               |          |
|---------------------------------------------------------------------------------------------------------------------------------------------------------------------------------------|----------------------|----------|---------------|----------|
| <i>LAnomRt ~ lag(TobRt,2) * lag(LpmResinDailyInt,2) + lag(pm.Daily.Intpltd,2) + lag(LpmHerbDailyInt,2) + lag(pmResin,2) + lag(AlcRt,2) + lag(LAmph,2) + lag(LCocc,2) + lag(MHY,2)</i> |                      |          |               |          |
| Tobacco                                                                                                                                                                               | 0.07 (0.03, 0.11)    | 0.0006   | Adj.R.Squared | -0.0074  |
| LM.Cannabis_x_Resin.THC_x_Daily.Interpol.                                                                                                                                             | 6.27 (3.84, 8.7)     | 2.29E-06 | Statistic     | 20.8532  |
| LM.Cannabis_x_Herb.THC_x_Daily.Interpol.                                                                                                                                              | -5.46 (-7.58, -3.34) | 2.43E-06 | Deg.Freedom   | 5,88     |
| LM.Cannabis_x_Resin.THC                                                                                                                                                               | -5.74 (-8.8, -2.68)  | 0.0004   | P-Value       | 1.09E-13 |
| Income                                                                                                                                                                                | 0 (0, 0)             | 0.0036   |               |          |



Supplementary Table S17. Panel Regression Table for Anorectal Stenosis and Atresia

| Parameters                                                                                                                                                                                |                         |          | Model Parameters |          |
|-------------------------------------------------------------------------------------------------------------------------------------------------------------------------------------------|-------------------------|----------|------------------|----------|
| Term                                                                                                                                                                                      | Estimate (C.I.)         | P-Value  | Parameter        | Value    |
|                                                                                                                                                                                           |                         |          |                  |          |
| <i>Additive</i>                                                                                                                                                                           |                         |          |                  |          |
| <i>Rate ~ Tobacco + Alcohol + LM.Cannabis_x_Herb.THC_x_Daily.Interpol. + LM.Cannabis_x_Resin.THC_x_Daily.Interpol. + Herb + Daily.Interpol. + Amphetamines + Cocaine + Income</i>         |                         |          |                  |          |
| LM.Cannabis_x_Herb.THC_x_Daily.Interpol.                                                                                                                                                  | -0.64 (-0.97, -0.31)    | 0.0003   | Adj.R.Squared    | 0.0442   |
| LM.Cannabis_x_Resin.THC_x_Daily.Interpol.                                                                                                                                                 | 0.71 (0.34, 1.08)       | 0.0003   | Statistic        | 14.0779  |
| Daily.Interpol.                                                                                                                                                                           | -47.71 (-62.09, -33.33) | 2.02E-09 | Deg.Freedom      | 4,117    |
| Cocaine                                                                                                                                                                                   | 0.59 (0.36, 0.82)       | 2.72E-06 | P-Value          | 2.08E-09 |
|                                                                                                                                                                                           |                         |          |                  |          |
| <i>Interactive</i>                                                                                                                                                                        |                         |          |                  |          |
| <i>Rate ~ Tobacco * Resin * LM.Cannabis_x_Resin.THC_x_Daily.Interpol. + Herb + LM.Cannabis_x_Herb.THC_x_Daily.Interpol. + Alcohol + Daily.Interpol. + Amphetamines + Cocaine + Income</i> |                         |          |                  |          |
| Herb                                                                                                                                                                                      | -5.8 (-9.96, -1.64)     | 0.0071   | Adj.R.Squared    | 0.1984   |
| Alcohol                                                                                                                                                                                   | 0.11 (0.04, 0.19)       | 0.0027   | Statistic        | 14.9668  |
| Daily.Interpol.                                                                                                                                                                           | -41.7 (-56.58, -26.82)  | 2.31E-07 | Deg.Freedom      | 6,115    |
| Cocaine                                                                                                                                                                                   | 0.59 (0.32, 0.86)       | 3.22E-05 | P-Value          | 1.35E-12 |
| Income                                                                                                                                                                                    | 0 (0, 0)                | 0.0002   |                  |          |
| Tobacco: Resin                                                                                                                                                                            | 0.12 (0.07, 0.17)       | 7.35E-06 |                  |          |
|                                                                                                                                                                                           |                         |          |                  |          |
| <i>2 Lags</i>                                                                                                                                                                             |                         |          |                  |          |
| <i>Rate ~ Tobacco * Daily.Interpol. + Resin * LM.Cannabis_x_Resin.THC_x_Daily.Interpol. + Herb + LM.Cannabis_x_Herb.THC_x_Daily.Interpol. + Alcohol + Amphetamines + Cocaine + Income</i> |                         |          |                  |          |
| Tobacco                                                                                                                                                                                   | 0.09 (0.02, 0.15)       | 0.0074   | Adj.R.Squared    | 0.0131   |
| Daily.Interpol.                                                                                                                                                                           | 213 (74.62, 351.38)     | 0.0035   | Statistic        | 7.0592   |
| LM.Cannabis_x_Resin.THC_x_Daily.Interpol.                                                                                                                                                 | -0.57 (-0.91, -0.23)    | 0.0015   | Deg.Freedom      | 8,85     |
| Herb                                                                                                                                                                                      | -4.44 (-8.56, -0.32)    | 0.0375   | P-Value          | 4.10E-07 |
| Alcohol                                                                                                                                                                                   | 0.13 (0.04, 0.22)       | 0.0074   |                  |          |
| Income                                                                                                                                                                                    | 0 (0, 0)                | 4.82E-06 |                  |          |
| Tobacco: Daily.Interpol.                                                                                                                                                                  | -9.18 (-14.79, -3.57)   | 0.0019   |                  |          |
| Resin: LM.Cannabis_x_Resin.THC_x_Daily.Interpol.                                                                                                                                          | 4.98 (2.33, 7.63)       | 0.0004   |                  |          |

Supplementary Table S18. Panel Regression Table for Hirschprungs Disease

| Parameters                                                                                                                                                                                          |                         |          | Model Parameters |          |
|-----------------------------------------------------------------------------------------------------------------------------------------------------------------------------------------------------|-------------------------|----------|------------------|----------|
| Term                                                                                                                                                                                                | Estimate (C.I.)         | P-Value  | Parameter        | Value    |
|                                                                                                                                                                                                     |                         |          |                  |          |
| <i>Additive</i>                                                                                                                                                                                     |                         |          |                  |          |
| <i>Rate ~ Tobacco + Alcohol + LM.Cannabis_x_Herb.THC_x_Daily.Interpol. + LM.Cannabis_x_Resin.THC_x_Daily.Interpol. + LM.Cannabis_x_Herb.THC + Daily.Interpol. + Amphetamines + Cocaine + Income</i> |                         |          |                  |          |
| LM.Cannabis_x_Herb.THC_x_Daily.Interpol.                                                                                                                                                            | -0.96 (-1.29, -0.62)    | 1.67E-07 | Adj.R.Squared    | 0.3607   |
| LM.Cannabis_x_Resin.THC_x_Daily.Interpol.                                                                                                                                                           | 1.06 (0.7, 1.42)        | 8.72E-08 | Statistic        | 35.4619  |
| Daily.Interpol.                                                                                                                                                                                     | 17.4 (8.7, 26.1)        | 0.0001   | Deg.Freedom      | 4,117    |
| Income                                                                                                                                                                                              | 0 (0, 0)                | 0.0008   | P-Value          | <2.2E-16 |
|                                                                                                                                                                                                     |                         |          |                  |          |
| <i>Interactive</i>                                                                                                                                                                                  |                         |          |                  |          |
| <i>Rate ~ Tobacco * Daily.Interpol. * LM.Cannabis_x_Resin.THC_x_Daily.Interpol. + LM.Cannabis_x_Herb.THC_x_Daily.Interpol. + LM.Cannabis_x_Herb.THC + Alcohol + Amphetamines + Cocaine + Income</i> |                         |          |                  |          |
| Daily.Interpol.                                                                                                                                                                                     | 31.15 (21.15, 41.15)    | 1.50E-08 | Adj.R.Squared    | 0.08198  |
| LM.Cannabis_x_Resin.THC_x_Daily.Interpol.                                                                                                                                                           | -4.72 (-6.77, -2.67)    | 1.54E-05 | Statistic        | 34.047   |
| LM.Cannabis_x_Herb.THC                                                                                                                                                                              | -11.12 (-18.11, -4.13)  | 0.0023   | Deg.Freedom      | 8,113    |
| Alcohol                                                                                                                                                                                             | -0.11 (-0.17, -0.05)    | 0.0003   | P-Value          | <2.2E-16 |
| Amphetamines                                                                                                                                                                                        | -0.25 (-0.44, -0.06)    | 0.01073  |                  |          |
| Tobacco: LM.Cannabis_x_Resin.THC_x_Daily.Interpol.                                                                                                                                                  | 0.2 (0.11, 0.29)        | 4.52E-05 |                  |          |
| Daily.Interpol.: LM.Cannabis_x_Resin.THC_x_Daily.Interpol.                                                                                                                                          | 631.85 (426.44, 837.25) | 2.12E-08 |                  |          |
| Tobacco: Daily.Interpol.: LM.Cannabis_x_Resin.THC_x_Daily.Interpol.                                                                                                                                 | -24.89 (-33.76, -16.01) | 2.44E-07 |                  |          |

|                                                                                                                                                                                                                |                      |          |               |          |
|----------------------------------------------------------------------------------------------------------------------------------------------------------------------------------------------------------------|----------------------|----------|---------------|----------|
|                                                                                                                                                                                                                |                      |          |               |          |
| 2 Lags                                                                                                                                                                                                         |                      |          |               |          |
| Rate ~ Tobacco * LM.Cannabis_x_Herb.THC_x_Daily.Interpol. + LM.Cannabis_x_Resin.THC_x_Daily.Interpol. + Daily.Interpol. + LM.Cannabis_x_Herb.THC + Alcohol + Daily.Interpol. + Amphetamines + Cocaine + Income |                      |          |               |          |
| LM.Cannabis_x_Herb.THC_x_Daily.Interpol.                                                                                                                                                                       | -1.5 (-1.87, -1.13)  | 5.60E-12 | Adj.R.Squared | 0.2067   |
| LM.Cannabis_x_Resin.THC_x_Daily.Interpol.                                                                                                                                                                      | 1.62 (1.23, 2.01)    | 2.00E-12 | Statistic     | 46.6245  |
| Daily.Interpol.                                                                                                                                                                                                | 31.77 (22.23, 41.31) | 3.99E-09 | Deg.Freedom   | 4,89     |
| Alcohol                                                                                                                                                                                                        | -0.14 (-0.21, -0.07) | 0.0002   | P-Value       | <2.2E-16 |

## SUPPLEMENTARY FIGURES

Correlation Plot - Substances and Gastrointestinal Anomaly Rates

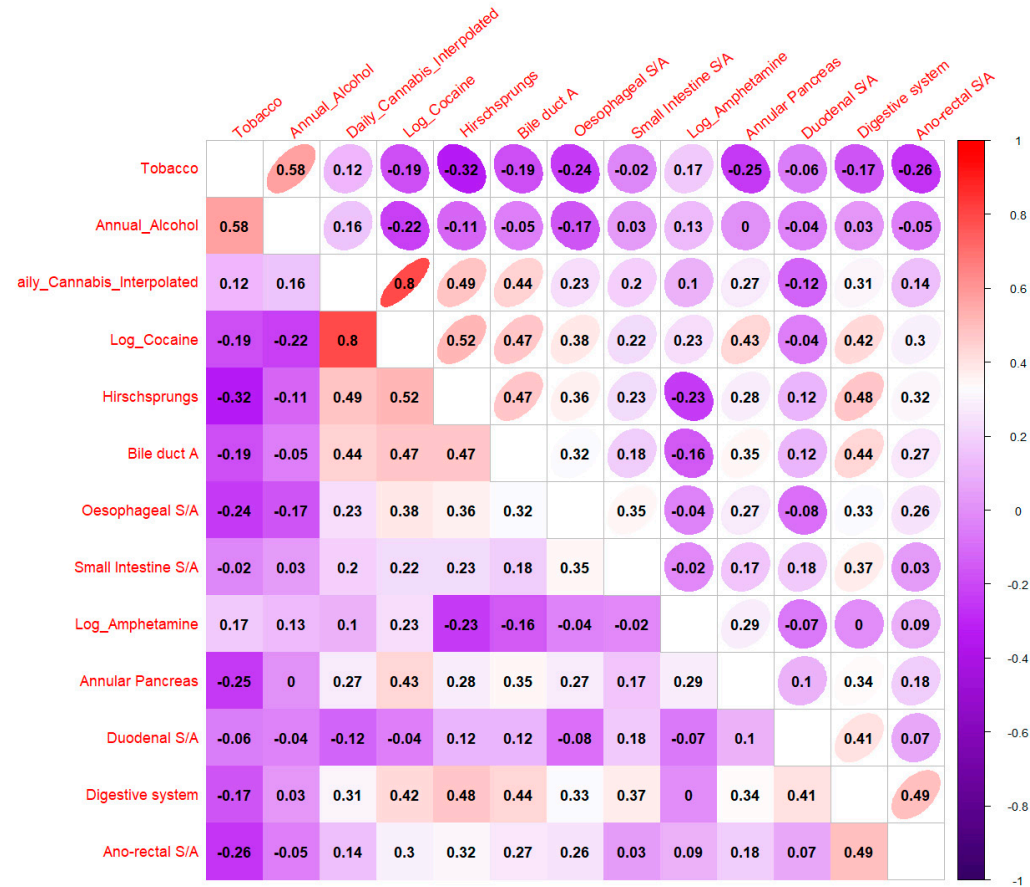

Supplementary Figure S1. Pearson correlation coefficients between substance use and selected gastrointestinal anomalies.

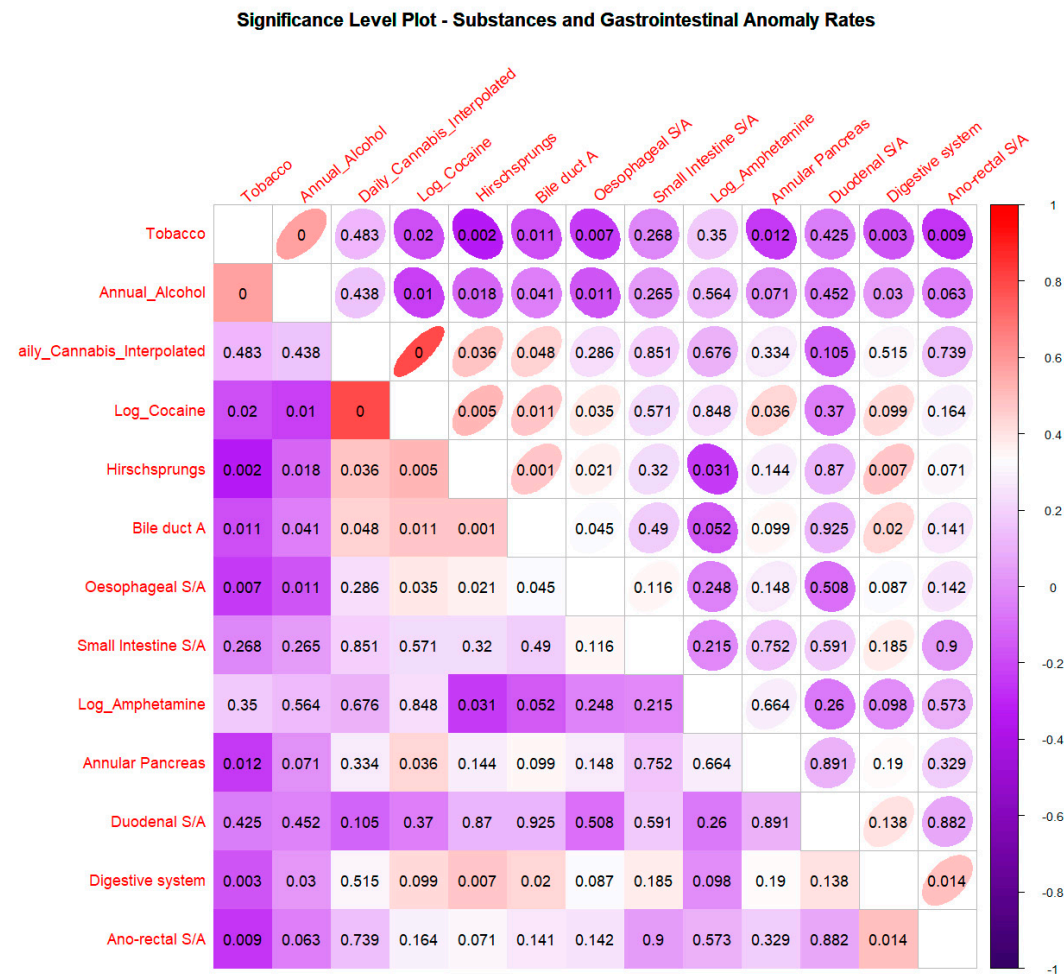

Supplementary Figure S2. Significance levels of Pearson correlation coefficients between substance use and selected gastrointestinal anomalies shown in Supplementary Figure 1.

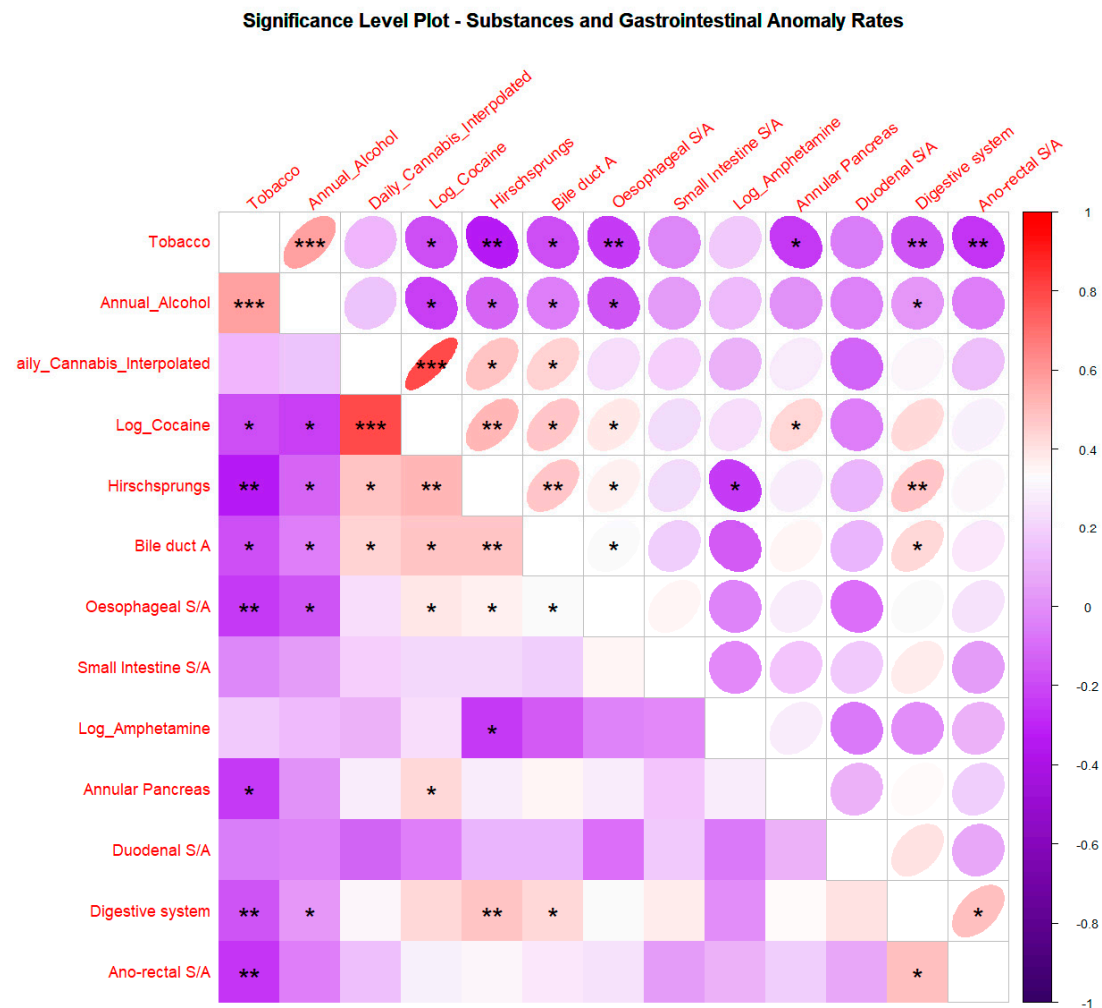

Supplementary Figure S3. Semi-quantitative significance levels of Pearson correlation coefficients between substance use and selected gastrointestinal anomalies shown in Supplementary Figure 1, shown as glyphs.

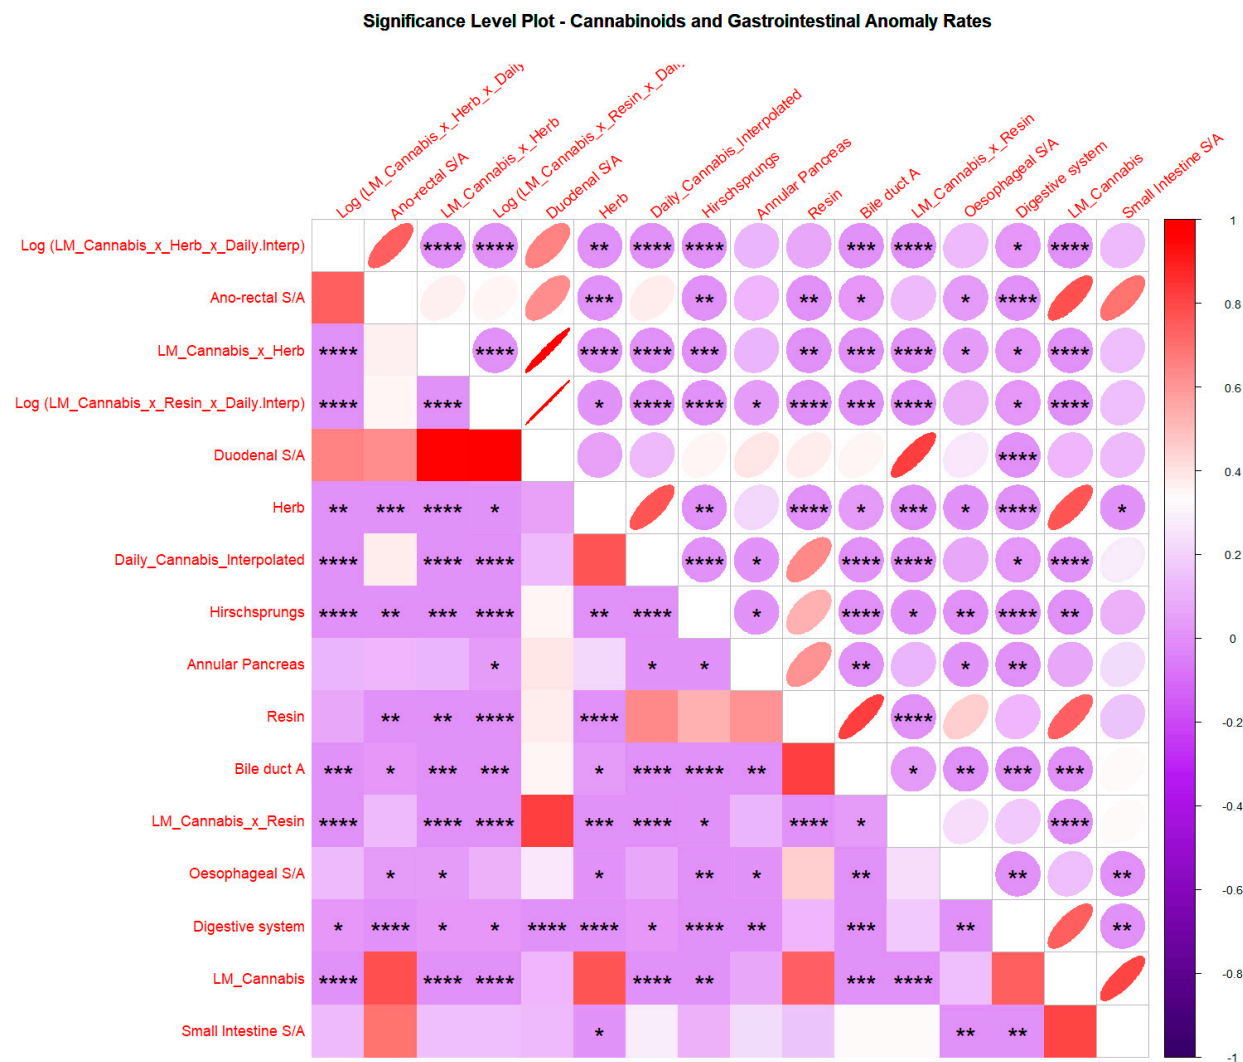

Supplementary Figure S4. Semi-quantitative significance levels of Pearson correlation coefficients shown in Figure 3 between metrics of cannabis exposure and selected gastrointestinal anomalies, shown as glyphs.

**Edited (Red) Links (Blue) to European Country  
Neighbourhood Links for Gastrointestinal Anomalies Dataset**

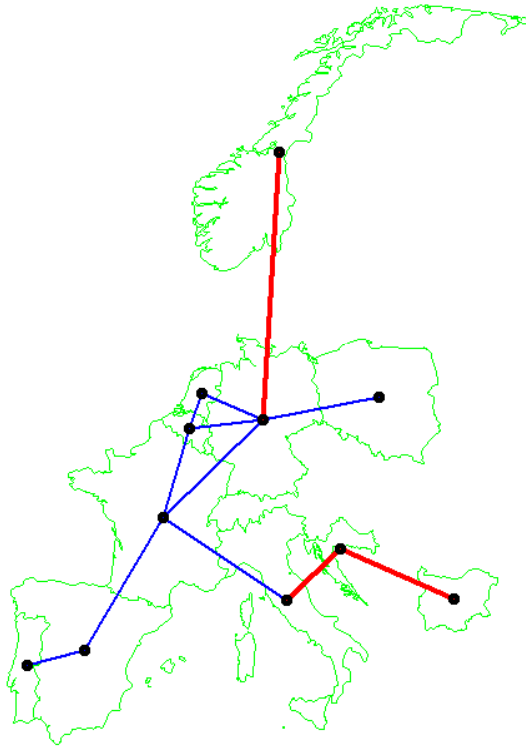

**Final Country Neighbourhood Links for  
European Gastrointestinal Anomalies Dataset**

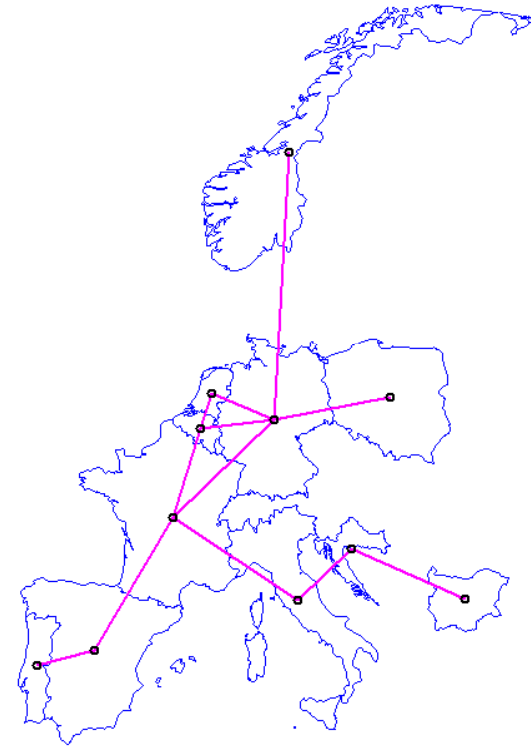

Supplementary Figure S5. Links between nations used to define the sparse spatial weight matrix for geospatial modelling.
